# Supplementary material for: Effects of egg-adaptation on receptor-binding and antigenic properties of recent influenza A (H3N2) vaccine viruses
Source: PubMed Central journal article supplement (PMC5394856; doi:10.1099/jgv.0.000457), 2016-06-15
Supplement: jgv-97-1333-s001.pdf [file jgv-97-1333-s001.pdf]

**Supplementary Figure 1. Representative structure of IAV (H3N2) receptor-binding site labelled with key amino acid residues in complex with human receptor-analogue (6-SLN)**

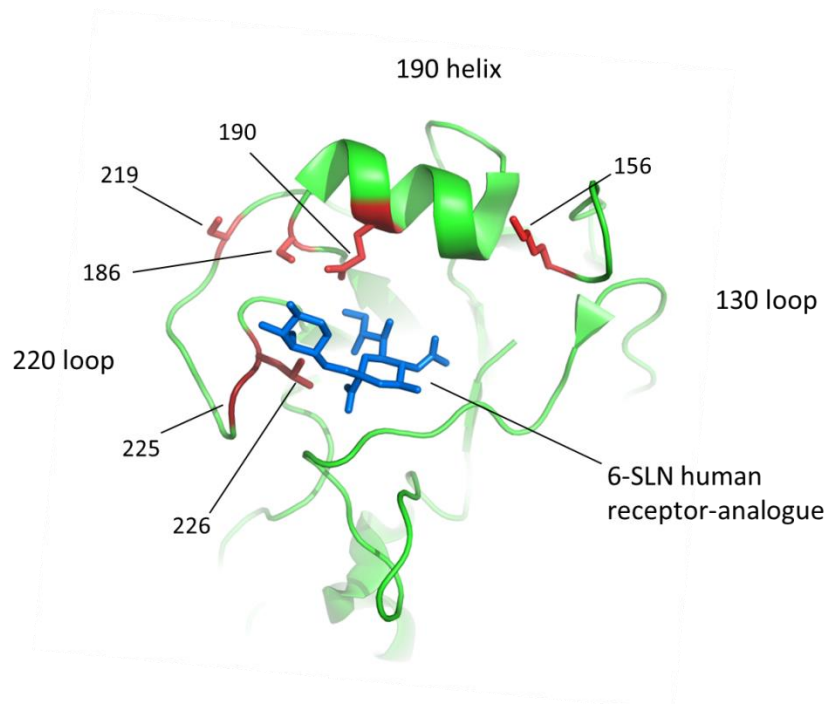

Monomeric structure of receptor binding site of representative influenza A (H3N2) virus HA in complex with a human receptor-analogue 6-SLN coloured blue (RCSB Protein Data Bank file reference 2YPG). Residues of interest in these studies; 156, 186, 190, 219, 225 and 226, are coloured red and labelled with amino acid residue number (H3 numbering). Diagram created using PyMol (Schrödinger).

**Supplementary Table 1. HI Titres of egg-propagated Tex50e and CVV viruses**

| Test Viruses*                | Haemagglutination Inhibition Titre <sup>†</sup> |
|------------------------------|-------------------------------------------------|
|                              | Post-infection Ferret Antiserum                 |
|                              | Tex50e                                          |
| A/Texas/50/2012 <sup>E</sup> | <b>5120</b>                                     |
| X-223 <sup>V</sup>           | 5120                                            |
| X-223a <sup>V</sup>          | 2560                                            |

\*E – egg-propagated and V – CVV. <sup>†</sup>Homologous HI titre highlighted in bold text.

**Supplementary Table 2. Source of viruses and CVV used in these studies**

| Virus                                         | Passage History | Originating Laboratory                                          |
|-----------------------------------------------|-----------------|-----------------------------------------------------------------|
| A/Victoria/361/2011<br>egg-propagated         | E3/E5           | VIDRL, Pete Doherty Institute,<br>Melbourne, Australia          |
| A/Victoria/361/2011<br>cell-propagated        | MDCK2/SIAT5     | VIDRL, Pete Doherty Institute,<br>Melbourne, Australia          |
| IVR-165 CVV                                   | Ex/E1           | VIDRL, Pete Doherty Institute,<br>Melbourne, Australia          |
| X-217 CVV                                     | Ex/E1           | New York Medical College, USA                                   |
| NIB-79 CVV                                    | Ex/E1           | NIBSC, UK                                                       |
| A/Texas/50/2012<br>egg-propagated             | E5/E2           | CDC, Atlanta, USA                                               |
| X-223 CVV                                     | Ex/E1           | New York Medical College, USA                                   |
| A/Switzerland/9715293/2013<br>egg-propagated  | E4/E2           | The Francis Crick Institute, Mill<br>Hill Laboratory, London UK |
| A/Switzerland/9715293/2013<br>cell-propagated | SIAT1/SIAT5     | The Francis Crick Institute, Mill<br>Hill Laboratory, London UK |
| NIB-88 CVV                                    | Ex/E1           | NIBSC, UK                                                       |
| X-247 CVV                                     | Ex/E1           | New York Medical College, USA                                   |

All viruses were obtained from stocks held in the Crick Worldwide Influenza Centre, The Francis Crick Institute, Mill Hill Laboratory, UK. All CVVs are classical 6:2 reassortants containing HA and NA gene segments of the prototype virus with the remaining six genes from A/Puerto Rico/8/34, with the exception of X-247, which also contains the NS gene of prototype A/Switzerland/9715293/2013 making it a 5:3 reassortant. All CVVs were propagated in 10-11 day old embryonated hens' eggs. Other viruses were initially isolated from clinical isolates by National Influenza Centres before propagation in MDCK-SIAT1 cells or 10-11 day old embryonated hens' eggs by the originating laboratories. The HA and NA gene sequences of all viruses were confirmed by Sanger sequencing methods after propagation.
